# Supplementary material for: A pyrolysis-free Ni/Fe bimetallic electrocatalyst for overall water splitting
Source: Springer Nature journal article supplement (doi:10.1038/s41467-023-37530-9), 2023-03-31
Supplement: MOESM1 [file 41467_2023_37530_MOESM1_ESM.pdf]

## Supporting Information

### **A pyrolysis-free Ni/Fe bimetallic electrocatalyst for overall water splitting**

*Ying Zang,<sup>1,2</sup> Di-Qiu Lu,<sup>1</sup> Kun Wang,<sup>2,3</sup> Bo Li,<sup>3</sup> Peng Peng,<sup>2\*</sup> Ya-Qian Lan,<sup>1</sup> Shuang-Quan Zang<sup>2\*</sup>*

\*Corresponding author. E-mail: 13020010407@163.com, zangsqzg@zzu.edu.cn

## Supplementary Figures

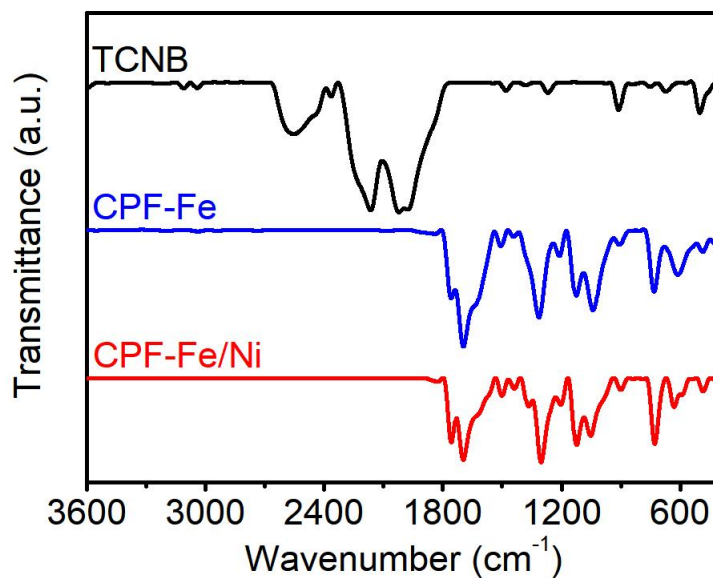

**Supplementary Fig. 1.** FT-IR of TCNB, CPF-Fe and CPF-Fe/Ni.

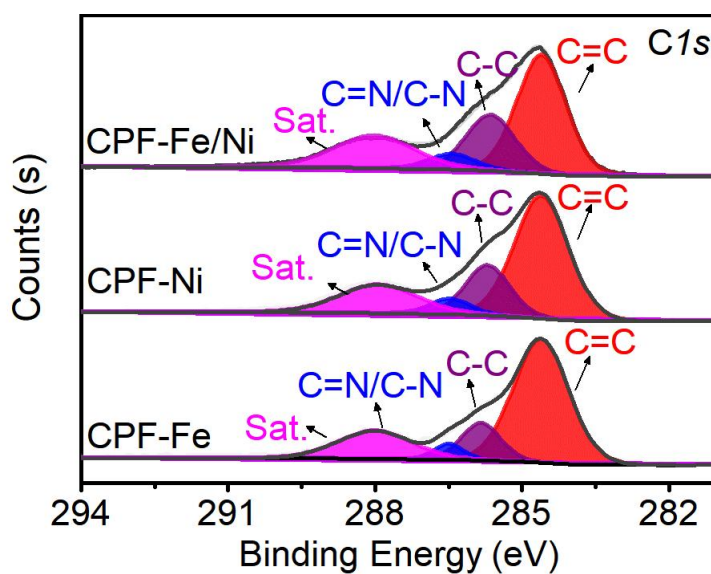

**Supplementary Fig. 2.** High-resolution  $\text{C}1\text{s}$  spectra of CPF-Fe and CPF-Fe/Ni.

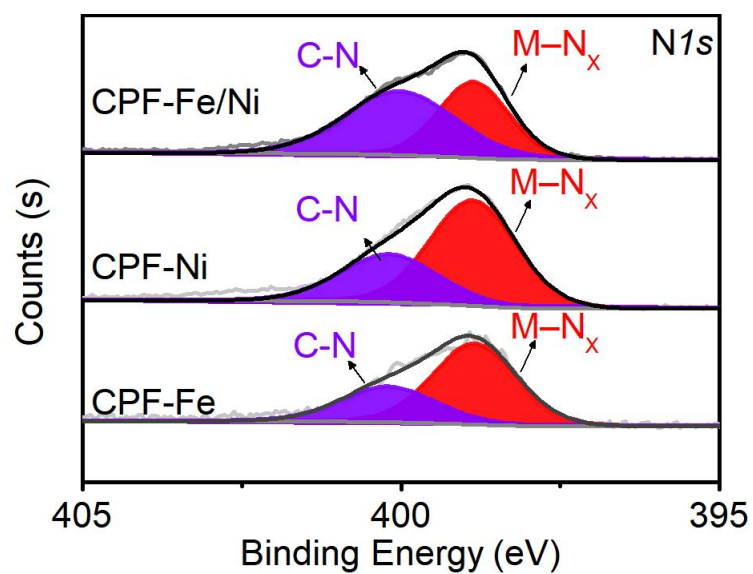

**Supplementary Fig. 3.** High-resolution N1s spectra of CPF-Fe and CPF-Fe/Ni.

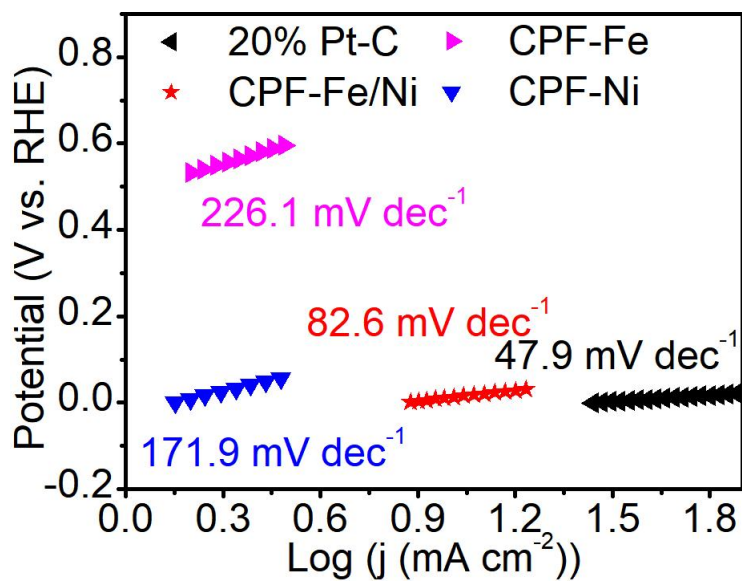

**Supplementary Fig. 4.** Tafel slopes for 20% Pt-C, CPF-Fe, CPF-Ni and CPF-Fe/Ni as HER catalysts in 0.5 M H<sub>2</sub>SO<sub>4</sub>.

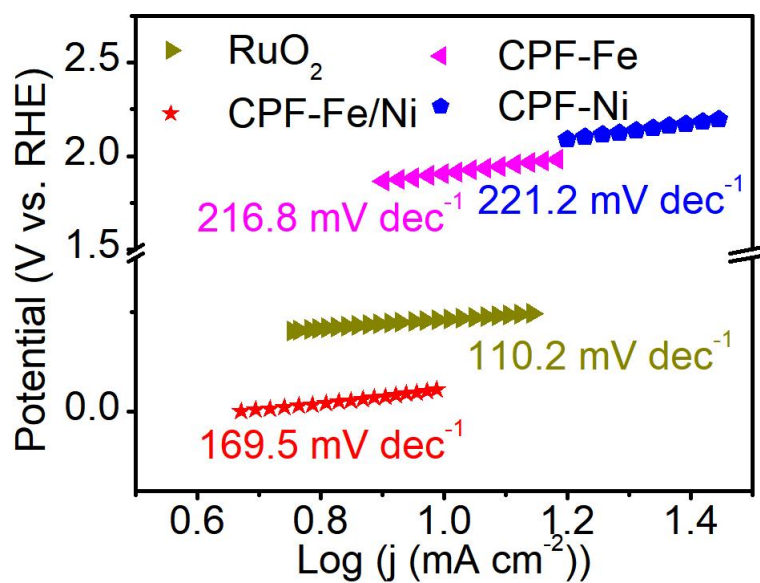

**Supplementary Fig. 5.** Tafel slopes for RuO<sub>2</sub>, CPF-Fe, CPF-Ni and CPF-Fe/Ni as OER catalyst in 0.5 M H<sub>2</sub>SO<sub>4</sub>.

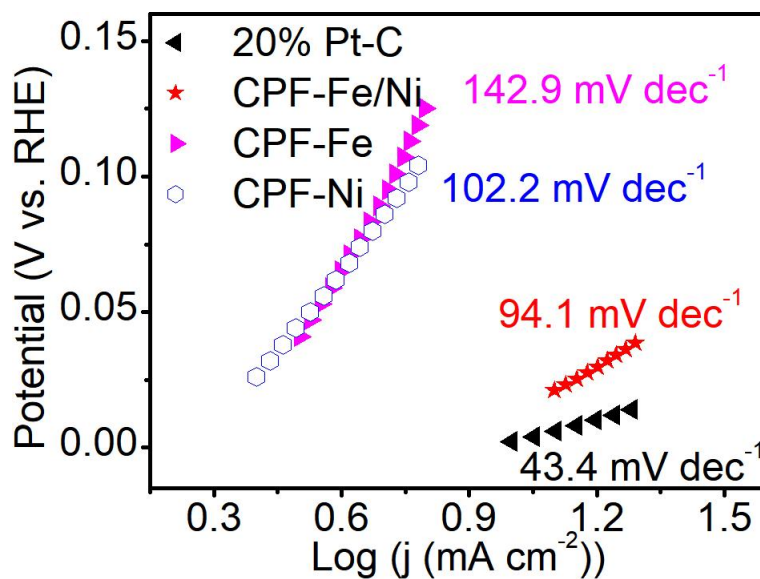

**Supplementary Fig. 6.** Tafel slopes for 20% Pt-C, CPF-Fe, CPF-Ni and CPF-Fe/Ni as HER catalyst in 1 M KOH.

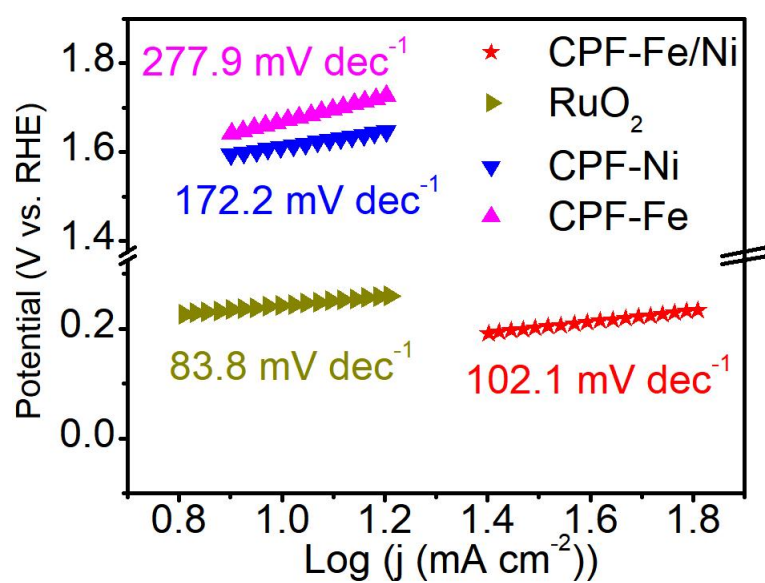

**Supplementary Fig. 7.** Tafel slopes for RuO<sub>2</sub>, CPF-Fe, CPF-Ni and CPF-Fe/Ni as OER catalyst in 1 M KOH.

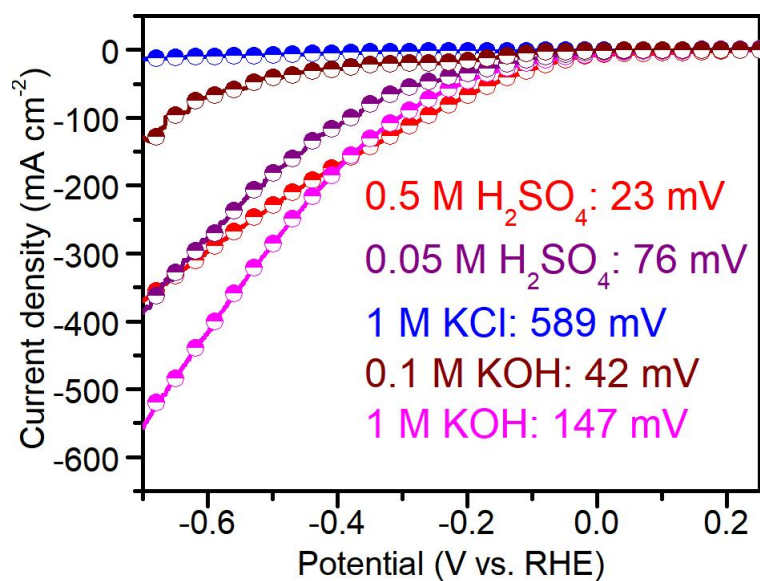

**Supplementary Fig. 8.** HER polarization curves with a speed of 10 mV s<sup>-1</sup> in a wide pH.

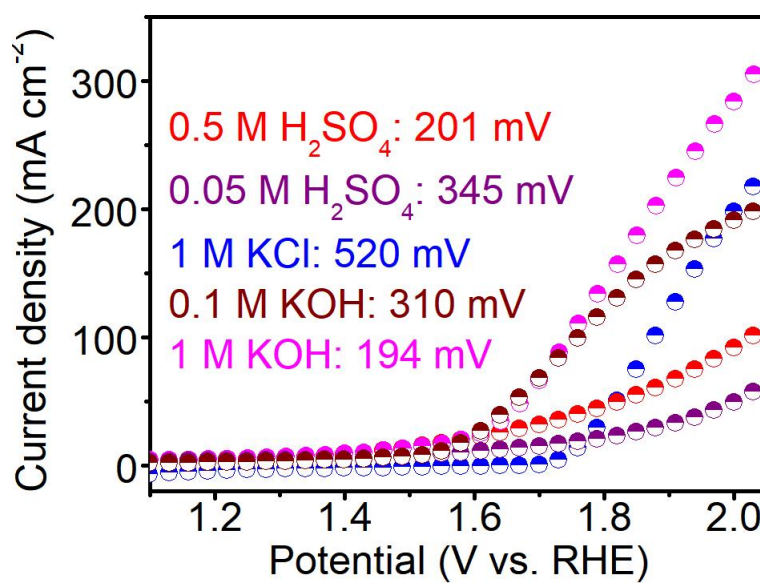

**Supplementary Fig. 9.** OER polarization curve with a speed of 10 mV s<sup>-1</sup> in a wide pH.

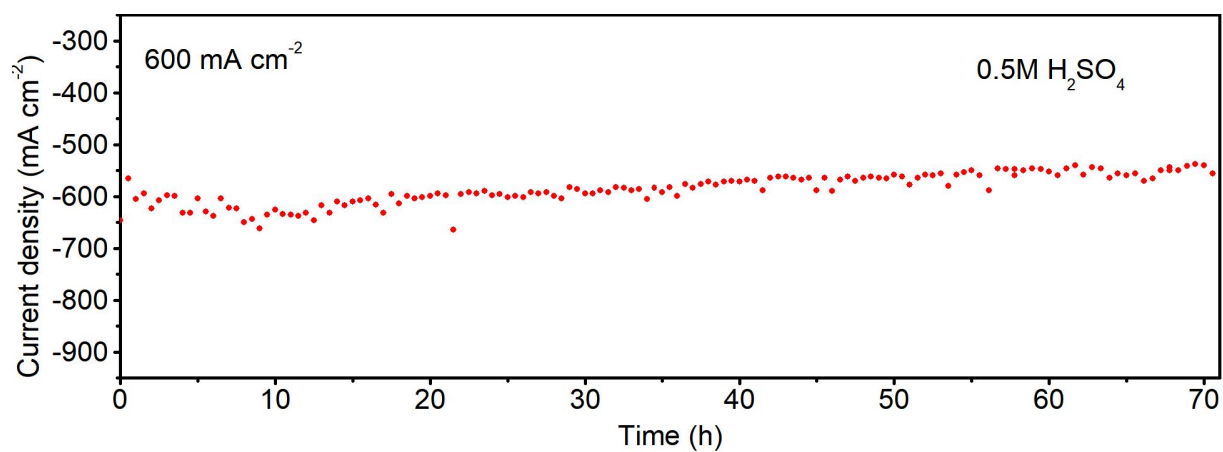

**Supplementary Fig. 10.** The chronopotentiometry of CPF-Fe/Ni in 0.5 M H<sub>2</sub>SO<sub>4</sub> at 600 mA cm<sup>-2</sup>.

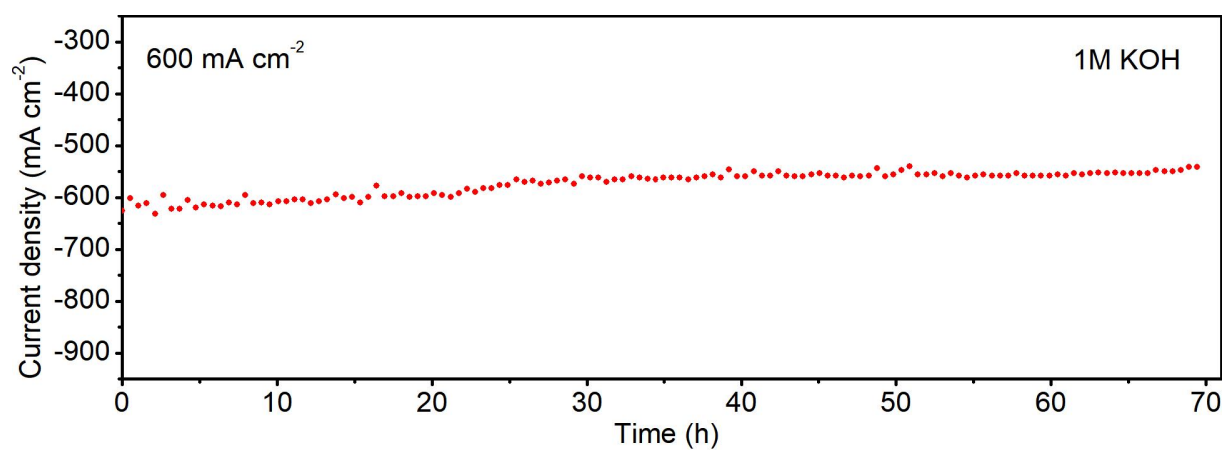

**Supplementary Fig. 11.** The chronopotentiometry of CPF-Fe/Ni in 1 M KOH at 600 mA cm<sup>-2</sup>.



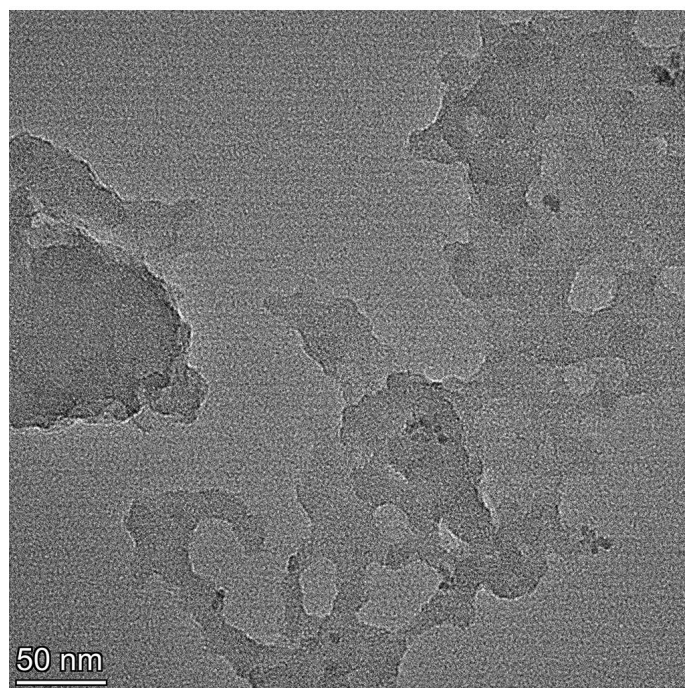

**Supplementary Fig. 12.** HR-TEM of CPF-Fe/Ni after electrocatalysis testing in 0.5 M H<sub>2</sub>SO<sub>4</sub>.

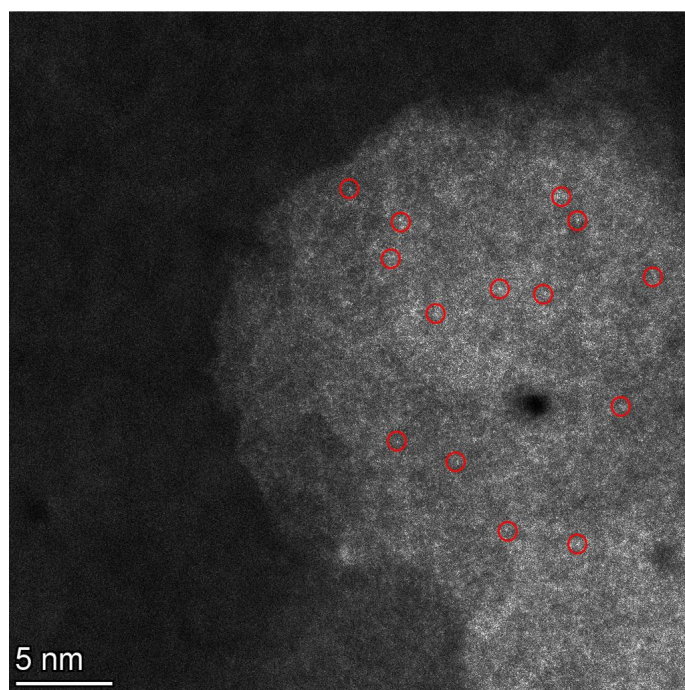

**Supplementary Fig. 13.** HAADF STEM image of CPF-Fe/Ni after electrocatalysis testing in 0.5 M H<sub>2</sub>SO<sub>4</sub>.



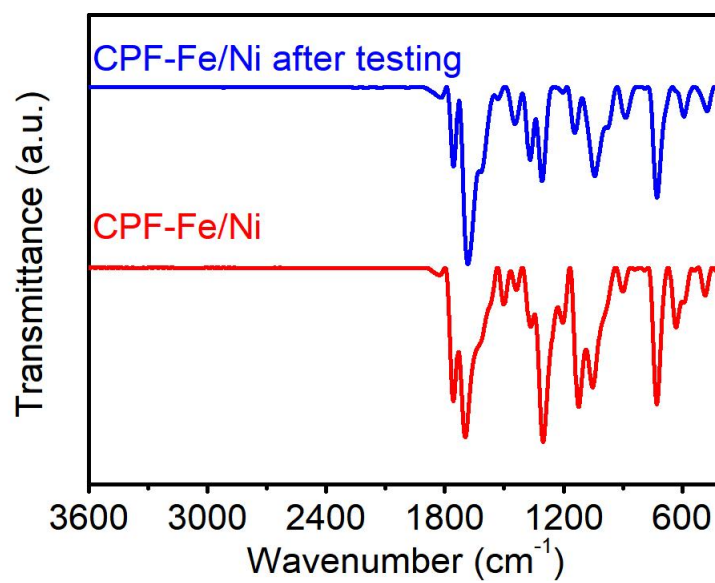

**Supplementary Fig. 14.** FT-IR of CPF-Fe/Ni after electrocatalysis testing in 0.5 M H<sub>2</sub>SO<sub>4</sub>.

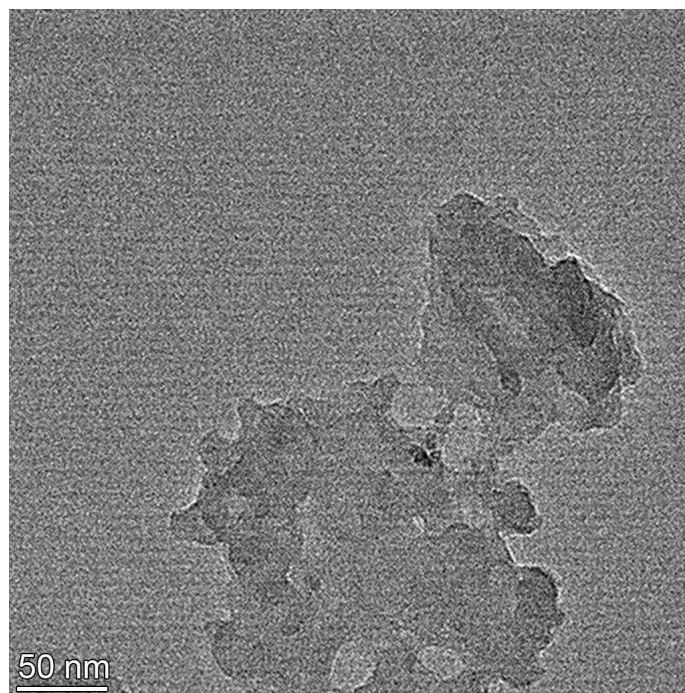

**Supplementary Fig. 15.** HR-TEM of CPF-Fe/Ni after electrocatalysis testing in 1 M KOH.

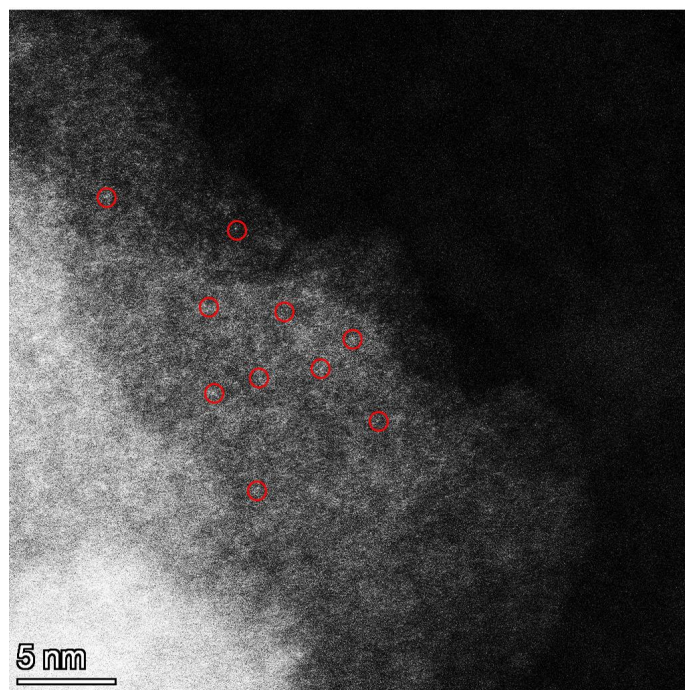

**Supplementary Fig. 16.** HAADF STEM image of CPF-Fe/Ni after electrocatalysis testing in 1 M KOH.

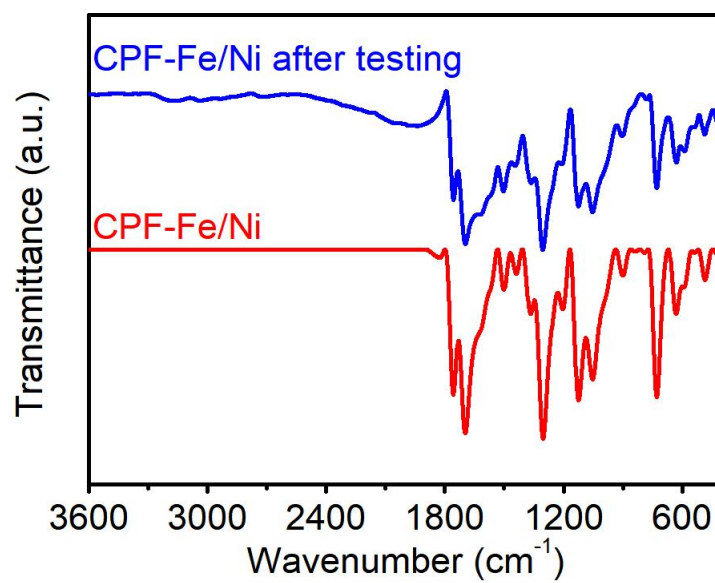

**Supplementary Fig. 17.** FT-IR of CPF-Fe/Ni after electrocatalysis testing in 1 M KOH.

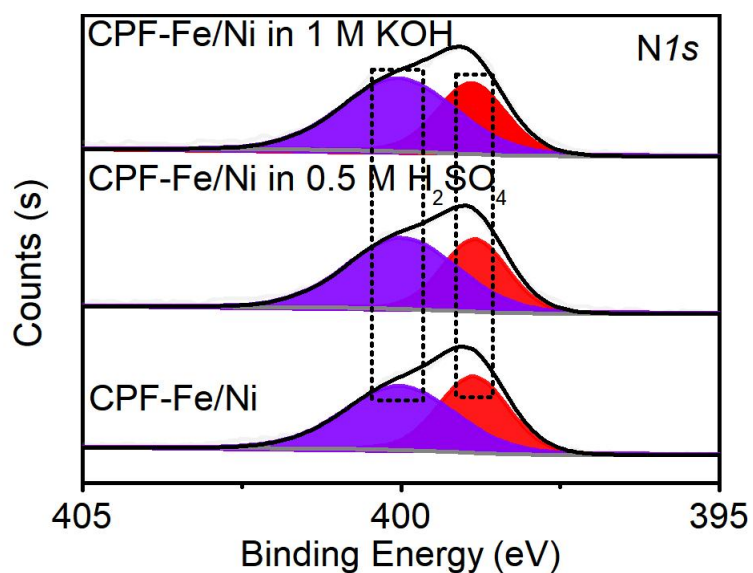

**Supplementary Fig. 18.** High-resolution N1s spectra of CPF-Fe/Ni after electrocatalysis testing in 0.5 M H<sub>2</sub>SO<sub>4</sub> and 1 M KOH, respectively.

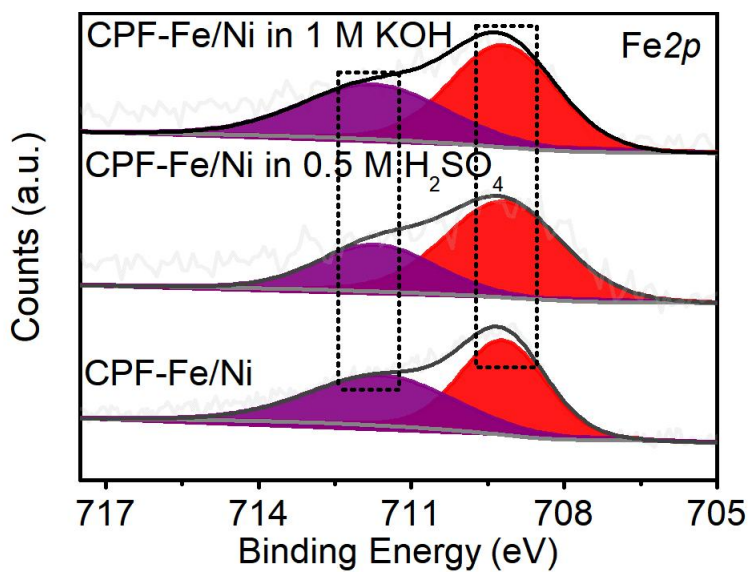

**Supplementary Fig. 19.** High-resolution Fe2p spectra of CPF-Fe/Ni after electrocatalysis testing in 0.5 M H<sub>2</sub>SO<sub>4</sub> and 1 M KOH, respectively.

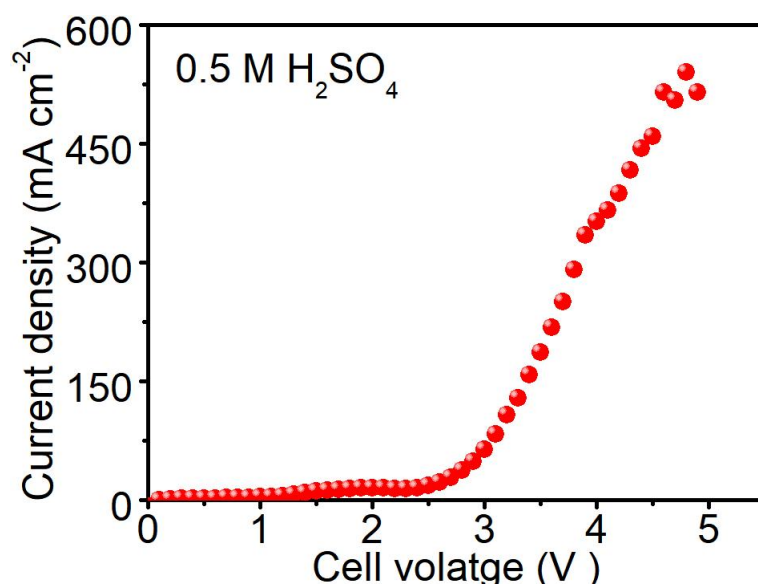

**Supplementary Fig. 20.** LSV curves of CPF-Fe/Ni coupled water electrolysis cell at a scan rate of 10 mV s<sup>-1</sup> in 0.5 M H<sub>2</sub>SO<sub>4</sub>.

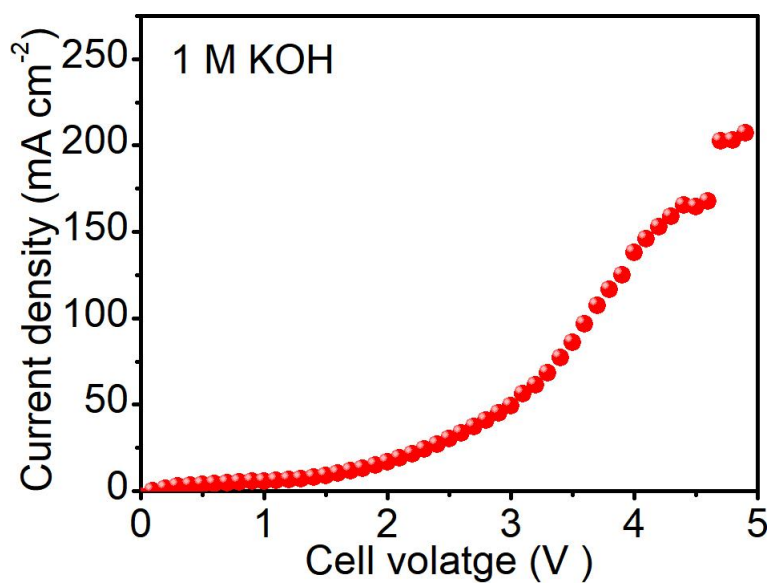

**Figure S21.** LSV curves of CPF-Fe/Ni coupled water electrolysis cell at a scan rate of 10 mV s<sup>-1</sup> in 1 M KOH.

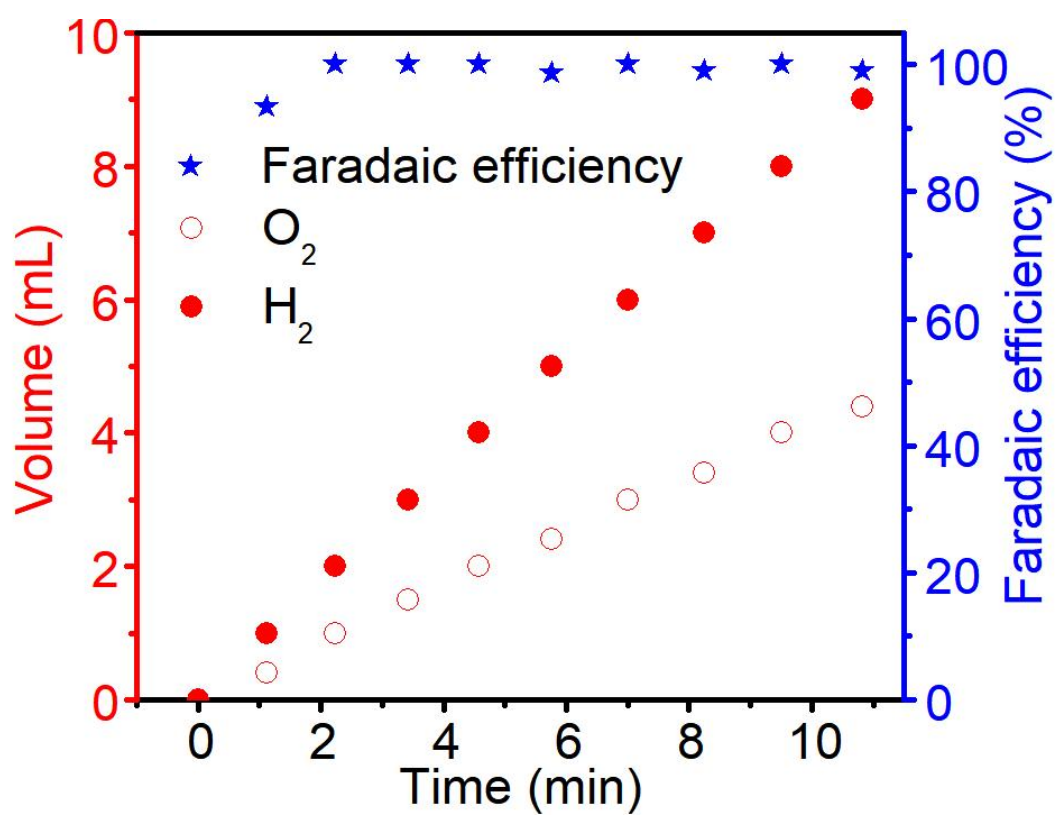

**Supplementary Fig. 22.** Experimental gas volumes of H<sub>2</sub> and O<sub>2</sub> during water splitting at a current density of 30 mA cm<sup>-2</sup> for 11 min in 0.5 M H<sub>2</sub>SO<sub>4</sub>, and the corresponding Faradaic efficiency of CPF-Fe/Ni.



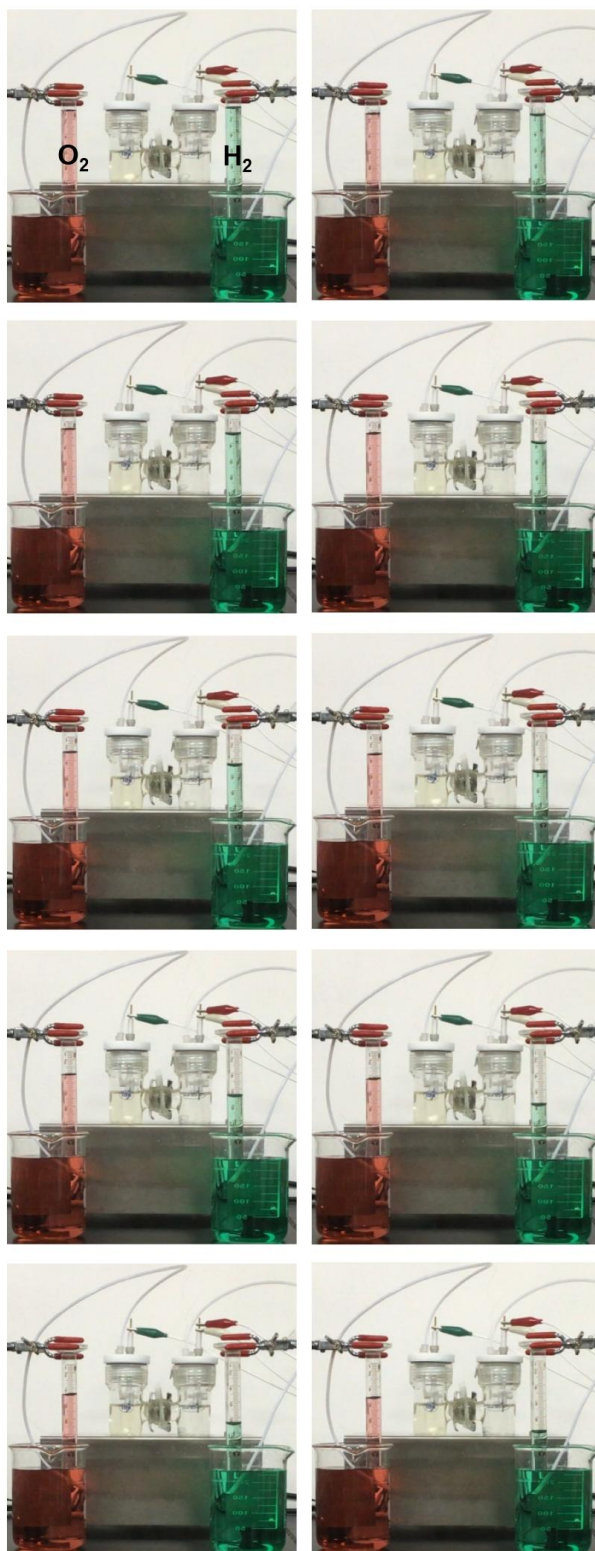

**Supplementary Fig. 23.** Hydrogen (green) and oxygen (red) generated at 0, 1.12, 2.23, 3.43, 4.58, 5.77, 7, 8.25, 9.5, and 10.83 min in 0.5 M  $\text{H}_2\text{SO}_4$ , respectively.

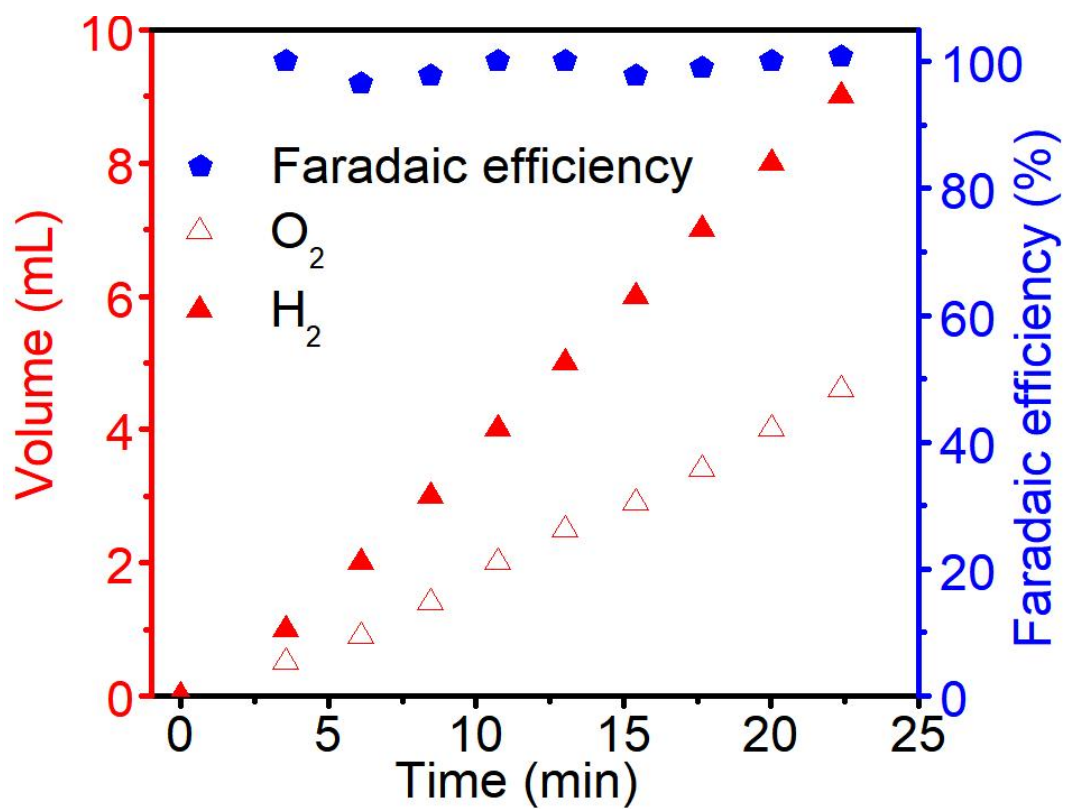

**Supplementary Fig. 24.** Experimental gas volumes of H<sub>2</sub> and O<sub>2</sub> during water splitting at a current density of 30 mA cm<sup>-2</sup> for 25 min in 1 M KOH, and the corresponding Faradaic efficiency of CPF-Fe/Ni.

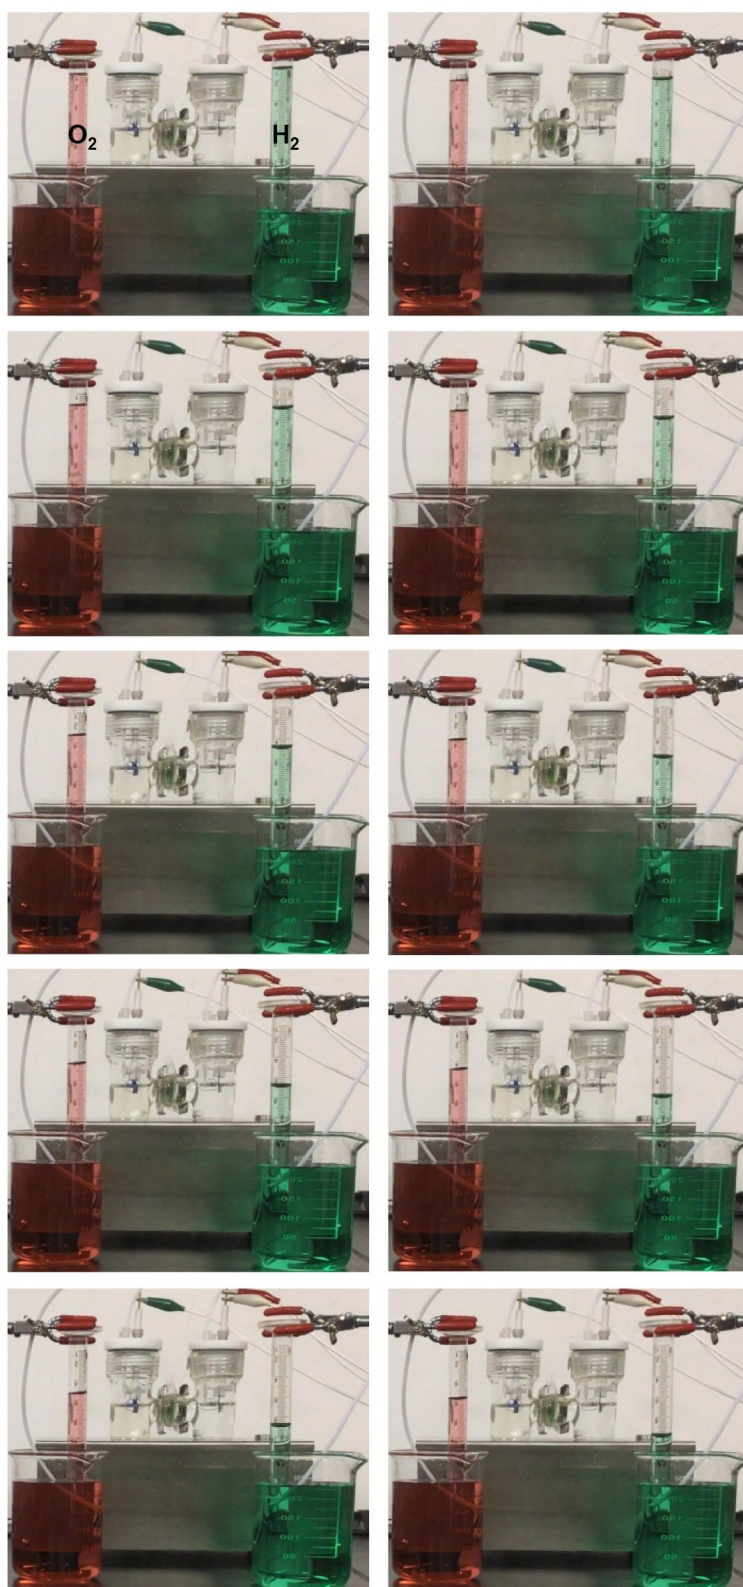

**Supplementary Fig. 25.** Hydrogen (green) and oxygen (red) generated at 0, 3.55, 6.1, 8.45, 10.76, 13.02, 15.42, 17.67, 20.03, and 22.38 min in 1 M KOH, respectively.

## Supplementary Tables

**Supplementary Table 1.** Comparison of different electrocatalytic activity for different water splitting catalysts under 10 mA cm<sup>-2</sup>.

|                                                            | 0.5 M<br>H <sub>2</sub> SO <sub>4</sub><br>$\eta$<br>HER/OER<br>(mV) | 1 M<br>KOH<br>$\eta$<br>HER/OER<br>(mV) | 0.5 M<br>H <sub>2</sub> SO <sub>4</sub><br>Cell<br>voltage<br>(V) | 1 M<br>KOH<br>Cell<br>voltage<br>(V) | Tafel<br>(mVdec <sup>-1</sup> )                                                                                          | TOF<br>(s <sup>-1</sup> )                                                                                                                       | Faradaic<br>Efficiency<br>(%) | Stability<br>(h)                                             | Ref                 |
|------------------------------------------------------------|----------------------------------------------------------------------|-----------------------------------------|-------------------------------------------------------------------|--------------------------------------|--------------------------------------------------------------------------------------------------------------------------|-------------------------------------------------------------------------------------------------------------------------------------------------|-------------------------------|--------------------------------------------------------------|---------------------|
| <b>CPF-Fe/Ni</b>                                           | <b>23/201</b>                                                        | <b>42/194</b>                           | <b>1.44</b>                                                       | <b>1.57</b>                          | <b>0.5 M<br/>H<sub>2</sub>SO<sub>4</sub>:<br/>82.6 (HER)<br/>94.1 (OER)<br/>1 M KOH:<br/>169.5 (HER)<br/>102.1 (OER)</b> | <b>H<sub>2</sub>SO<sub>4</sub>:<br/>3.16 (H<sub>2</sub>)<br/>1.12 (O<sub>2</sub>)<br/>KOH:<br/>2.64 (H<sub>2</sub>)<br/>1.4 (O<sub>2</sub>)</b> | <b>~ 100</b>                  | <b>H<sub>2</sub>SO<sub>4</sub>:<br/>120<br/>KOH:<br/>120</b> | <b>Our<br/>Work</b> |
| Ru/Co-N-C                                                  | 13/232                                                               | 23/247                                  | 1.49                                                              | 1.5                                  | 0.5 M<br>H <sub>2</sub> SO <sub>4</sub> :<br>40.7 (HER)<br>1 M KOH:<br>32.4 (HER)                                        | 9.2                                                                                                                                             | 96                            | H <sub>2</sub> SO <sub>4</sub> : 20<br>KOH: 15               | 1                   |
| W-NiS <sub>0.5</sub> Se <sub>0.5</sub>                     | --                                                                   | 39/171                                  | --                                                                | 1.44                                 | 1 M KOH:<br>51 (HER)<br>41 (OER)                                                                                         | 0.21                                                                                                                                            | ~<br>100                      | 500                                                          | 2                   |
| CoNiRu-NT                                                  | --                                                                   | 27/255                                  | --                                                                | 1.47                                 | 1 M KOH:<br>78 (HER)<br>67 (OER)                                                                                         | 0.330                                                                                                                                           | 95                            | 48                                                           | 3                   |
| FMZP4                                                      | --                                                                   | 53/184                                  | --                                                                | 1.79                                 | 1 M KOH:<br>53.2 (HER)<br>51.9 (OER)                                                                                     | 0.00893                                                                                                                                         | ~ 100                         | 80                                                           | 4                   |
| Co-Co <sub>0.85</sub> Se                                   | --                                                                   | 97/265                                  | --                                                                | 1.47                                 | 1 M KOH:<br>70.7 (HER)<br>78.0 (OER)                                                                                     | 4.4                                                                                                                                             | ~ 100                         | 12                                                           | 5                   |
| Mn <sub>2</sub> P-<br>Mn <sub>2</sub> O <sub>3</sub> /PNCF | --                                                                   | 98/330                                  | --                                                                | 1.56                                 | 1 M KOH:<br>46 (HER)<br>86 (OER)                                                                                         | --                                                                                                                                              | ~100                          | 72                                                           | 6                   |
| H-CoS <sub>x</sub> @NiFe<br>LDH/NF                         | --                                                                   | 95/250                                  | --                                                                | 1.98                                 | 1 M KOH:<br>90 (HER)<br>49 (OER)                                                                                         | 0.067                                                                                                                                           | 97                            | 100                                                          | 7                   |
| Co-BTC                                                     | --                                                                   | 437/370                                 | --                                                                | 2.03                                 | 1 M KOH:<br>115.1 (HER)<br>89.1<br>(OER))                                                                                | 1.23                                                                                                                                            | --                            | 5                                                            | 8                   |
| BPIr be catalyst                                           | 25/290                                                               | 198/290                                 | 1.57                                                              | 1.54                                 | 0.5 M<br>H <sub>2</sub> SO <sub>4</sub> :<br>30.9 (HER)<br>70 (OER)<br>1 M KOH:                                          | 22 (H <sub>2</sub> )<br>4.41 (O <sub>2</sub> )                                                                                                  | --                            | H <sub>2</sub> SO <sub>4</sub> :<br>2.5<br>KOH: 2.5          | 9                   |

|                                          |        |            |       |       |                                                                                                         |                                                  |                                                                |     |           |
|------------------------------------------|--------|------------|-------|-------|---------------------------------------------------------------------------------------------------------|--------------------------------------------------|----------------------------------------------------------------|-----|-----------|
|                                          |        |            |       |       | 91 (HER)                                                                                                |                                                  |                                                                |     |           |
| Ru/RuS <sub>2</sub> -2                   | 45/201 | --         | 1.501 | --    | 0.5 M<br>H <sub>2</sub> SO <sub>4</sub> :<br>30.9 (HER)<br>70 (OER)<br>1 M KOH:<br>91 (HER)<br>64 (OER) | 0.71 (H <sub>2</sub> )<br>0.61 (O <sub>2</sub> ) | --                                                             | 10  | <b>10</b> |
| Ru1/D-NiFe LDH                           | --     | 10/189     | --    | 1.419 | 1 M KOH:<br>29 (HER)<br>31 (OER)                                                                        | 7.66 (H <sub>2</sub> )                           | ~100 (H <sub>2</sub> )<br>99.6 (O <sub>2</sub> )               | 2.5 | <b>11</b> |
| D-CoP-HoMSs                              | --     | 93/294     | --    | 1.57  | 1 M KOH:<br>50 (HER)<br>67 (OER)                                                                        | --                                               | --                                                             | -   | <b>12</b> |
| NiCoPO@NC/P-NF-e                         | --     | 73.1/221.4 | --    | 1.5   | 1 M KOH:<br>82 (HER)<br>87.8 (OER)                                                                      | 0.21 (O <sub>2</sub> )                           | 98.5 (H <sub>2</sub> )<br>99.4 (O <sub>2</sub> )               | 48  | <b>13</b> |
| Ni <sub>0.6</sub> Fe <sub>0.4</sub> -MOG | --     | 159/285    | --    | 1.61  | 1 M KOH:<br>38 (HER)<br>63 (OER)                                                                        | 1.44(H <sub>2</sub> )<br>1.38(O <sub>2</sub> )   | ~ 100                                                          | 20  | <b>14</b> |
| Fe doped MOF<br>CoV@CoO<br>nanoflakes    | --     | 78/220     | --    | 1.53  | 1 M KOH:<br>86 (HER)<br>59 (OER)                                                                        | 0.45                                             | --                                                             | 50  | <b>15</b> |
| NiMoOx/NiMoS                             | --     | 38/186     | --    | 1.46  | 1 M KOH:<br>38 (HER)<br>34 (OER)                                                                        | 1.97                                             | 99.6±0.3<br>(H <sub>2</sub> )<br>97.5±0.4<br>(O <sub>2</sub> ) | 500 | <b>16</b> |
| CoFeO@BP                                 | --     | 88/256     | --    | --    | 1 M KOH:<br>51 (HER)<br>42 (OER)                                                                        | --                                               | ~ 100<br>(H <sub>2</sub> )<br>99.2 (O <sub>2</sub> )           | 24  | <b>17</b> |
| CoP-InNC@CNT                             | --     | 159/270    | --    | 1.58  | 1 M KOH:<br>63 (HER)<br>85 (OER)                                                                        | --                                               | --                                                             | 15  | <b>18</b> |
| Ni@N-HCGHF                               | --     | 95/260     | --    | 1.6   | 1 M KOH:<br>57 (HER)<br>63 (OER)                                                                        | --                                               | --                                                             | 20  | <b>19</b> |
| Co <sub>2</sub> P /CoNPC                 | --     | 208/328    | --    | 1.64  | 1 M KOH:<br>83.0 (HER)<br>72.6 (OER)                                                                    | --                                               | --                                                             | 8.3 | <b>20</b> |
| D-Ni-MOF<br>NSA                          | --     | 101/219    | --    | 1.5   | 1 M KOH:<br>50.9 (HER)<br>48.2 (OER)                                                                    | 1.224                                            |                                                                | 48  | <b>21</b> |
| FeNi(BDC)(DMF<br>,F)/NF                  | --     | 234/227    | --    | 1.58  | 1 M KOH:<br>96.2 (HER)<br>37.4 (OER)                                                                    | 0.298                                            | ~ 100                                                          | 30  | <b>22</b> |

|                                                 |    |         |    |      |                                   |    |      |    |    |
|-------------------------------------------------|----|---------|----|------|-----------------------------------|----|------|----|----|
| HOF-<br>Co <sub>0.5</sub> Fe <sub>0.5</sub> /NF | -- | 170/278 | -- | 1.63 | 1 M KOH:<br>137 (HER)<br>59 (OER) | -- | 99.9 | 20 | 23 |
|-------------------------------------------------|----|---------|----|------|-----------------------------------|----|------|----|----|

**Supplementary Table 2.** ICP of CPF-Fe/Ni before and after catalysis.

|                                                                   | Fe (%) | Ni (%) |
|-------------------------------------------------------------------|--------|--------|
| CPF-Fe/Ni before catalysis                                        | 11.90  | 1.35   |
| CPF-Fe/Ni after catalysis in 0.5 M H <sub>2</sub> SO <sub>4</sub> | 11.16  | 1.21   |
| CPF-Fe/Ni after catalysis in 1 M KOH                              | 11.32  | 1.18   |

### Supplementary Note

#### Structural characterization.

Fourier transform infrared (FT-IR) spectra were recorded on a Bruker ALPHA II FT-IR spectrometer.

<sup>13</sup>C MAS solid-state NMR experiments were performed on AVANCE(3)400WB at a resonance frequency of 150.15 MHz. <sup>13</sup>C NMR spectra were recorded with spinning rate of 15kHz with a 4mm probe at room temperature. <sup>13</sup>C CPMAS experiments were performed with a delay time of 5s. Scan number: 2048 scans.

The X-ray photoelectron spectroscopy (XPS) measurements were tested using ESCALAB 250 system (Thermo Electron) with an Al K $\alpha$  (300 W) X-ray resource (3.82 eV versus absolute vacuum value). All binding energies were calibrated to the C 1s peak (284.6 eV) arising from the adventitious carbon-containing species.

Field-emission scanning electron microscopy (FESEM) measurement was carried out using Zeiss Sigma 500.

The transmission electron microscopy (TEM) and high-resolution transmission electron microscopy (HRTEM) images were obtained in FEI TalosF200S equipment.



Sub-ångström-resolution high-angle annular dark-field scanning transmission electron microscopy (HAADF-STEM) characterization was conducted on a JEOLJEMARM300F STEM/TEM with a guaranteed resolution of 0.08 nm.

## Supplementary References

1. Rong C, *et al.* Electronic Structure Engineering of Single-Atom Ru Sites via Co-N<sub>4</sub> Sites for Bifunctional pH-Universal Water Splitting. *Adv. Mater.* **34**, 2110103 (2022).
2. Wang Y, *et al.* Highly Active and Durable Single-Atom Tungsten-Doped NiS<sub>0.5</sub>Se<sub>0.5</sub> Nanosheet @ NiS<sub>0.5</sub>Se<sub>0.5</sub> Nanorod Heterostructures for Water Splitting. *Adv. Mater.* **34**, 2107053 (2022).
3. Wang Y, *et al.* Competitive Coordination-Oriented Monodispersed Ruthenium Sites in Conductive MOF/LDH Hetero-Nanotree Catalysts for Efficient Overall Water Splitting in Alkaline Media. *Adv. Mater.* **34**, 2107488 (2022).
4. Huang L, *et al.* In situ phosphating of Zn-doped bimetallic skeletons as a versatile electrocatalyst for water splitting. *Energy Environ. Sci.*, **15**, 2425-2434 (2022).
5. Yu J, *et al.* Capture and recycling of toxic selenite anions by cobalt-based metal-organic-frameworks for electrocatalytic overall water splitting. *Chem. Eng. J.* **433**, 134553 (2022).
6. Wang X, *et al.* One-pot synthesis of Mn<sub>2</sub>P-Mn<sub>2</sub>O<sub>3</sub> heterogeneous nanoparticles in a P, N -doped three-dimensional porous carbon framework as a highly efficient bifunctional electrocatalyst for overall water splitting. *Chem. Eng. J.* **428**, 131190 (2022).
7. Lee Y, *et al.* Metal-Organic Framework-Derived Hollow CoS<sub>x</sub> Nanoarray Coupled with NiFe Layered Double Hydroxides as Efficient Bifunctional Electrocatalyst for Overall Water Splitting. *Small* **18**, 2200586 (2022).
8. Shreyanka S, *et al.* Multiscale design of 3D metal-organic frameworks (M-BTC, M: Cu, Co, Ni) via PLAL enabling bifunctional electrocatalysts for robust overall water splitting. *Chem. Eng. J.* **446**, 137045 (2022).
9. Mei J, *et al.* Surface-Dependent Intermediate Adsorption Modulation on Iridium-Modified Black Phosphorus Electrocatalysts for Efficient pH-Universal Water Splitting. *Adv. Mater.* **33**, 2104638 (2021).
10. Zhu J, *et al.* Regulative Electronic States around Ruthenium/Ruthenium Disulphide Heterointerfaces for Efficient Water Splitting in Acidic Media. *Angew., Chem. Int. Ed.* **60**, 12328-12334 (2021).
11. Zhai P, *et al.* Engineering single-atomic ruthenium catalytic sites on defective nickel-iron layered double hydroxide for overall water splitting. *Nat. Commun.* **12**, 4587 (2021).
12. Hou P, *et al.* Delicate Control on the Shell Structure of Hollow Spheres Enables Tunable Mass Transport in Water Splitting. *Angew., Chem. Int. Ed.* **60**, 6926-6931 (2021).
13. Gao H, *et al.* Nickel-cobalt phosphate nanoparticles wrapped in nitrogen-doped carbon loading on partially phosphatized foamed nickel as efficient electrocatalyst for water splitting. *Chem. Eng. J.* **426**, 130854 (2021).
14. Zhang X, Zhao H, Li C, Li S, Liu K, Wang L. Facile coordination driven synthesis of metal-organic gels toward efficiently electrocatalytic overall water splitting. *Appl. Catal. B: Environ.* **299**, 120641 (2021).
15. Muthurasu A, *et al.* Construction of iron doped cobalt- vanadate- cobalt oxide with metal-organic framework oriented nanoflakes for portable rechargeable zinc-air batteries powered total water splitting. *Chem. Eng. J.* **88**, 106238 (2021).

16. Zhai P, et al. Engineering active sites on hierarchical transition bimetal oxides/sulfides heterostructure array enabling robust overall water splitting. *Nat. Commun.* **11**, 5462 (2020).
17. Li X, et al. Adaptive Bifunctional Electrocatalyst of Amorphous CoFe Oxide@2D Black Phosphorus for Overall Water Splitting. *Angew., Chem. Int. Ed.* **59**, 21106-21113 (2020).
18. Chai L, et al. Stringing Bimetallic Metal-Organic Framework-Derived Cobalt Phosphide Composite for High-Efficiency Overall Water Splitting. *Adv. Sci.* **7**, 1903195 (2020).
19. Yan L, et al. A Freestanding 3D Heterostructure Film Stitched by MOF-Derived Carbon Nanotube Microsphere Superstructure and Reduced Graphene Oxide Sheets: A Superior Multifunctional Electrode for Overall Water Splitting and Zn-Air Batteries. *Adv. Mater.* **32**, 2003313 (2020).
20. Liu H, et al. Metal-Organic-Framework-Derived Co<sub>2</sub> P Nanoparticle/Multi-Doped Porous Carbon as a Trifunctional Electrocatalyst. *Adv. Mater.* **32**, 2003649 (2020).
21. Zhou J, et al. Alkali-Etched Ni(II)-Based Metal-Organic Framework Nanosheet Arrays for Electrocatalytic Overall Water Splitting. *Small* **16**, 1906564 (2020).
22. Lin H-W, Senthil Raja D, Chuah X-F, Hsieh C-T, Chen Y-A, Lu S-Y. Bi-metallic MOFs possessing hierarchical synergistic effects as high performance electrocatalysts for overall water splitting at high current densities. *Appl. Catal. B: Environ.* **258**, 118023 (2019).
23. Liu FQ, et al. Constructing bimetal-complex based hydrogen-bonded framework for highly efficient electrocatalytic water splitting. *Appl. Catal. B: Environ.* **258**, 117973 (2019).
